# Supplementary material for: The Efficacy of PGT-A versus Conventional IVF/ICSI in Infertile Women of Advanced Maternal Age (≥38 Years): A Comparative Analysis of Cumulative Live Birth Rates per Oocyte Retrieval Cycle
Source: Research Square preprint supplement (doi:10.21203/rs.3.rs-8394709/v1), 2026-01-22
Supplement: Supplementary file 1 [file cce1a013b2577edde66d9536.pdf]

**Table 3** Embryo classification by PGT [n (%)]

| Female age | Total | Euploid    | Undetermined |
|------------|-------|------------|--------------|
| 38≤Age<40  | 107   | 62 (57.94) | 45 (42.06)   |
| 40≤Age<42  | 85    | 29 (34.18) | 56 (65.82)   |
| 42≤Age≤45  | 33    | 7 (21.21)  | 26 (78.79)   |

PGT-A: preimplantation genetic testing for aneuploidy. "Undetermined" (non-transferable) conclude: aneuploid, mosaic, and biopsy-failed embryos.
